# Supplementary material for: Improved analysis of excited state proton transfer kinetics by the combination of standard and convolution methods
Source: Royal Society of Chemistry journal article supplement (doi:10.1039/c3pp25445c), 2013-02-14
Supplement: c3pp25445c.pdf [file c3pp25445c.pdf]

## Electronic Supplementary Information for

# Improved Analysis of Excited State Proton Transfer Kinetics by the Combination of Standard and Convolution Methods

*Adilson A. Freitas,<sup>1</sup> António A. L. Maçanita<sup>1</sup> and Frank H. Quina<sup>2</sup>*

<sup>1</sup>Centro de Química Estrutural, Instituto Superior Técnico, Universidade Técnica de Lisboa, 1049-001

Lisbon, Portugal.

<sup>2</sup>Instituto de Química and the USP Research Consortium for Photochemical Technology, Universidade de São Paulo, CP 26077, São Paulo 05513-970, Brazil.

## ESPT of 7-hydroxy-4-methylflavylium in water: 2 species

Given the reversible reactions represented by Scheme 1S:

Scheme 1S.

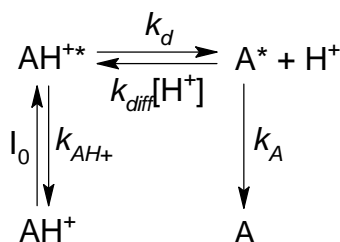

the time evolution of the species can be represented by the following differential equation:

$$\frac{d}{dt} \begin{bmatrix} \text{AH}^{+*} \\ \text{A}^* \end{bmatrix} = \begin{bmatrix} -X_w & k_{diff}[\text{H}^+] \\ k_d & -Y_w \end{bmatrix} \times \begin{bmatrix} \text{AH}^{+*} \\ \text{A}^* \end{bmatrix} \quad (\text{S1})$$

where  $X_w = k_{AH^+} + k_d$  and  $Y_w = k_A + k_{diff}[\text{H}^+]$ . The initial concentrations of  $\text{AH}^{+*}$  and  $\text{A}^*$  are  $[\text{AH}^{+*}]_0$  and 0, respectively, and the time-dependent concentrations,  $C_i(t)$ , of the species in the excited state can be written in integrated form as  $C_i(t) = P_i \otimes C_{i\delta}$  based on the concept of convolution (Reference 4 of the paper), where  $P_i$  is the rate of production of the species  $C_i$  and  $C_{i\delta}$  is the respective delta response function. For the flavylium cation and the quinonoidal base the respective rates of production and delta responses are:

$$P_{\text{AH}^{+*}} = [\text{AH}^{+*}]_0 \delta(t) + k_{diff}[\text{H}^+][\text{A}^*] \quad (\text{S2})$$

$$P_{\text{A}^*} = k_d[\text{AH}^{+*}] \quad (\text{S3})$$

$$C_{\text{AH}^{+*}\delta} = [\text{AH}^{+*}]_0 \delta(t) = e^{-X_w t} \quad (\text{S4})$$

$$C_{\text{A}^*\delta} = [\text{A}^*] \delta(t) = e^{-Y_w t} \quad (\text{S5})$$

Thus, the temporal evolutions of the concentrations of  $\text{AH}^{+*}$  and  $\text{A}^*$  are:

$$[AH^{+*}] = [AH^{+*}]_0 e^{-X_w t} + k_{diff} [H^+] [A^*] \otimes e^{-X_w t} \quad (S6)$$

$$[A^*] = k_d [AH^{+*}] \otimes e^{-Y_w t} \quad (S7)$$

Equations S6 and S7 can be solved by Laplace transformation theory,  $\mathcal{L}\{f(t)\} = \int_0^{\infty} e^{-st} f(t) dt$ , and the solution for reversible first order reactions is described in reference 4. Here we are interested only in the temporal evolution of  $[A^*]$  and do not need to solve equation S6 since  $[AH^{+*}]$  will serve as the effective Instrument Response Function (in practical terms,  $k_d[AH^{+*}]$  will operate as if it were a delta function). From the algebraic properties of convolution, the convolution of a delta function with some other function results in the function itself at the position of the delta function. Thus, the time evolution of the quinonoidal base using the signal of  $AH^{+*}$  as the IRF is:

$$[A^*] = e^{-Y_w t} \quad (S8)$$

and the monoexponential lifetime obtained gives the two rate constants for the deactivation of the excited state of  $A^*$ , as experimentally observed for the ESPT of HMF in water.

**ESPT of 7-hydroxy-4-methylflavylium in water-dioxane mixtures and functionalized flavylium salts anchored in SDS micelles: 3 observable species involved in ESPT**

Given Scheme 2S below:

**Scheme 2S.**

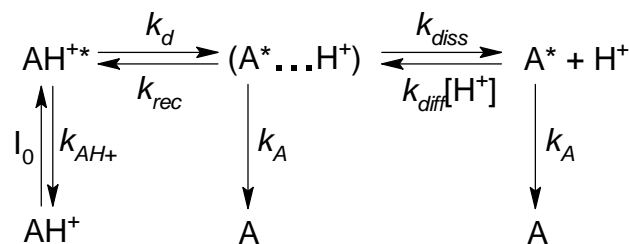

the corresponding kinetics obey the differential equation,

$$\frac{d}{dt} \begin{bmatrix} AH^{+*} \\ (A^* \cdots H^+) \\ A^* \end{bmatrix} = \begin{bmatrix} -X & k_{rec} & 0 \\ k_d & -Y & k_{diff}[H^+] \\ 0 & k_{diss} & -Z \end{bmatrix} \times \begin{bmatrix} AH^{+*} \\ (A^* \cdots H^+) \\ A^* \end{bmatrix} \quad (S9)$$

where  $X = k_{AH^+} + k_d$ ,  $Y = k_A + k_{rec} + k_{diss}$  and  $Z = k_A + k_{diff}[H^+]$  represent the sums of the rate constants for all the decay processes of  $AH^{+*}$  and  $(A^* \cdots H^+)$ , respectively. Since all of the processes indicated in Scheme 2S are first (or pseudo-first) order, it is also possible in this case to write the time-dependent concentration  $C_i(t)$  of the species directly in the integrated form, as done in the previous case. At pHs below 2, only the flavylium cation is present in solution and the initial concentrations of  $[AH^{+*}]$ ,  $(A^* \cdots H^+)$  and  $[A^*]$  are  $[AH^{+*}]_0$ , 0 and 0, respectively. Thus, the Delta responses  $C_{i\delta}$  can be written as:

$$[AH^{+*}]\delta(t) = e^{-Xt} \quad (S10)$$

$$[A^* \cdots H^+]\delta(t) = e^{-Yt} \quad (S11)$$

$$[A^*]\delta(t) = e^{-Zt} \quad (S12)$$

Because the initial concentrations  $[A^* \cdots H^+]_0$  and  $[A^*]_0$  are zero, the production rates  $P_i$  are:

$$P_{AH^{+*}} = [AH^{+*}]_0 \delta(t) + k_{rec} [A^* \cdots H^+] \quad (S13)$$

$$P_{A^* \cdots H^+} = [A^* \cdots H^+]_0 \delta(t) + k_d [AH^{+*}] + k_{diff} [H^+] [A^*]$$

$$P_{A^* \cdots H^+} = k_d [AH^{+*}] + k_{diff} [H^+] [A^*] \quad (S14)$$

$$P_{A^*} = [A^*]_0 \delta(t) + k_{diss} [A^* \cdots H^+]$$

$$P_{A^*} = k_{diss} [A^* \cdots H^+] \quad (S15)$$

Substituting the Delta responses and production rates of the species in the equation  $C_i(t) = P_i \otimes C_{i\delta}$ , the concentrations  $C_i(t)$  are given by:

$$[AH^{+*}] = [AH^{+*}]_0 \delta(t) \otimes e^{-Xt} + k_{rec} [A^* \cdots H^+] \otimes e^{-Xt}$$

$$[AH^{+*}] = [AH^{+*}]_0 e^{-Xt} + k_{rec} [A^* \cdots H^+] \otimes e^{-Xt} \quad (S16)$$

$$[A^* \cdots H^+] = k_d [AH^{+*}] \otimes e^{-Yt} + k_{diff} [H^+] [A^*] \otimes e^{-Yt} \quad (S17)$$

$$[A^*] = k_{diss} [A^* \cdots H^+] \otimes e^{-Zt} \quad (S18)$$

Thus, taking the decay of  $AH^{+*}$  measured at 480 nm as the effective IRF that generates the decay at 620 nm, the overall product  $[B^*]$  will be the sum of the concentrations of the geminate pair and the quinonoidal base, i.e.,  $[B^*] = [A^* \cdots H^+] + [A^*]$ . From the properties of Laplace transforms,  $\mathcal{L}\{f \otimes g\} = \mathcal{L}\{f\} \cdot \mathcal{L}\{g\}$  and from Laplace transform tables  $\mathcal{L}\{e^{-at}\} = 1/(s+a)$ . The Laplace transforms of S17 and S18 are, respectively:

$$\overline{[A^* \cdots H^+]} = \frac{k_d \overline{[AH^{+*}]}}{(s+Y)} + \frac{k_p [H^+] \overline{[A^*]}}{(s+Y)} \quad (S19)$$

$$\overline{[A^*]} = \frac{k_{diss} \overline{[A^* \cdots H^+]}}{(s+Z)} \quad (S20)$$

In this case, the temporal evolutions of  $[A^*\cdots H^+]$  and  $[A^*]$  are not independent and equations S19 and S20 are coupled. The solution of S19 and S20 gives:

$$\overline{[A^*\cdots H^+]} = \frac{k_d \overline{[AH^{+*}]}(s+Z)}{(s+Y)(s+Z) - k_{diss}k_{diff}[H^+]} \quad (S21)$$

$$\overline{[A^*]} = \frac{k_{diss}k_d \overline{[AH^{+*}]}}{(s+Y)(s+Z) - k_{diss}k_{diff}[H^+]} \quad (S22)$$

Reorganizing the denominator in both equations leads to

$$\overline{[A^*\cdots H^+]} = \frac{k_d \overline{[AH^{+*}]}(s+Z)}{(s+\beta)(s+\gamma)} \quad (S23)$$

$$\overline{[A^*]} = \frac{k_{diss}k_d \overline{[AH^{+*}]}}{(s+\beta)(s+\gamma)} \quad (S24)$$

where  $\beta = \frac{Y+Z - \sqrt{(Y-Z)^2 + 4k_{diss}k_{diff}[H^+]}}{2}$  and  $\gamma = \frac{Y+Z + \sqrt{(Y-Z)^2 + 4k_{diss}k_{diff}[H^+]}}{2}$ .

On the other hand, the inverse Laplace transform  $\mathcal{L}^{-1}\left\{\frac{s+\alpha}{(s+a)(s+b)}\right\}$  is  $\frac{(\alpha-a)}{b-a}e^{-at} - \frac{(\alpha-b)}{b-a}e^{-bt}$  and

the inverse of  $\mathcal{L}^{-1}\left\{\frac{1}{(s+a)(s+b)}\right\}$  is  $\frac{1}{b-a}e^{-at} - \frac{1}{b-a}e^{-bt}$ . With these pieces of information, the

solutions of S23 and S24 are:

$$[A^*\cdots H^+] = k_d[AH^{+*}] \otimes \left\{ \frac{1}{\gamma-\beta} \left[ (Z-\beta)e^{-\beta t} - (Z+\gamma)e^{-\gamma t} \right] \right\} \quad (S25)$$

$$[A^*] = k_d[AH^{+*}] \otimes \left[ \frac{k_{diss}}{\gamma-\beta} (e^{-\beta t} - e^{-\gamma t}) \right] \quad (S26)$$

$$[B^*] = [A^*\cdots H^+] + [A^*] \quad (S27)$$

$$[B^*] = k_d[AH^{+*}] \otimes \left\{ \frac{1}{\gamma-\beta} \left[ (Z-\beta+k_{diss})e^{-\beta t} + (\gamma-Z-k_{diss})e^{-\gamma t} \right] \right\} \quad (S28)$$

where the term  $k_d[AH^{+*}]$  is the effective IRF. Equation S28 predicts a double-exponential decay with  $\tau_1 = 1/\beta$  and  $\tau_2 = 1/\gamma$  for a system of two reactions coupled in series, in agreement with the experimental results for HMF in aqueous-organic solvent mixtures and for functionalized flavylum salts anchored in SDS micelles.

## Determining the individual rate constants

The differential Equation S9 (equivalent to equation 5 of the paper) predicts triple-exponential decays for all species,  $X_i^* = \text{AH}^+^*$ ,  $(\text{A}^*\cdots\text{H}^+)$  and  $\text{A}^*$ :

$$[X_i^*] = a_{i,1}e^{-\lambda_1 t} + a_{i,2}e^{-\lambda_2 t} + a_{i,3}e^{-\lambda_3 t} \quad (\text{S29})$$

The reciprocals of the three decay times,  $\lambda_j = 1/\tau_j$ , are the eigenvalues of the constant matrix  $\mathbf{k}$ , which can be expressed as a function of the diagonal reciprocal decay time matrix  $\boldsymbol{\lambda}$ , and the pre-exponential coefficient ( $a_{i,j}$ ) matrix  $\mathbf{a}$ , as:<sup>17,S1</sup>

$$\mathbf{k} = \mathbf{a}\boldsymbol{\lambda}\mathbf{a}^{-1} \quad (\text{S30})$$

However, Equation S30 cannot be solved analytically in the present case because the pre-exponential coefficients ( $a_{i,j}$ ) of the “matrix of concentrations”  $\mathbf{a}$  cannot be equated to the experimental coefficients of the “matrix of fluorescence intensities”  $\mathbf{A}$ ,<sup>17</sup> because there are 3 kinetically discernible species but only 2 are spectroscopically observable. Thus, the matrix  $\mathbf{A}$  is a  $2 \times 3$  matrix with  $A_{2,j} = a_{2,j} + a_{3,j}$  (assuming that the radiative rate constants of the free base  $\text{A}^*$  and the geminate pair  $\text{A}^*\cdots\text{H}^+$  are equal). However, the analysis can be substantially improved by independently measuring the lifetime of the base ( $1/k_{\text{A}} = 1.46 \times 10^{-10}$  s) in solutions with  $\text{pH} > 9$  and the lifetime of the acid in the absence of the excited state proton transfer process ( $1/k_{\text{AH}^+} = 3.13 \times 10^{-9}$  s), taken to be equal to the lifetime of the parent compound 7-methoxy-4-methyl-flavylium ion (MMF). Since the 9 pieces of experimental information (3 decay times, 3 pre-exponential coefficients at 480 nm and 3 pre-exponential coefficients at 620 nm, listed in Table 1S) are sufficient to evaluate the remaining 4 unknowns,  $\mathbf{k}$  can be estimated by minimization of the deviations between the calculated and experimental decay times and pre-exponential coefficients.<sup>17,9</sup>

The analysis of the results for the water:dioxane mixture with  $x_{\text{Dx}} = 0.18$ , based on Scheme 2S (equivalent to Scheme 3 of the paper), provides the individual values of  $k_{\text{d}}$ ,  $k_{\text{rec}}$ ,  $k_{\text{diss}}$  and  $k_{\text{diff}}$  (shown in Figure 1S) and separates the rate constants involved in the proton transfer processes (deprotonation and recombination) from the diffusional ones (pair dissociation and diffusion-controlled encounter).



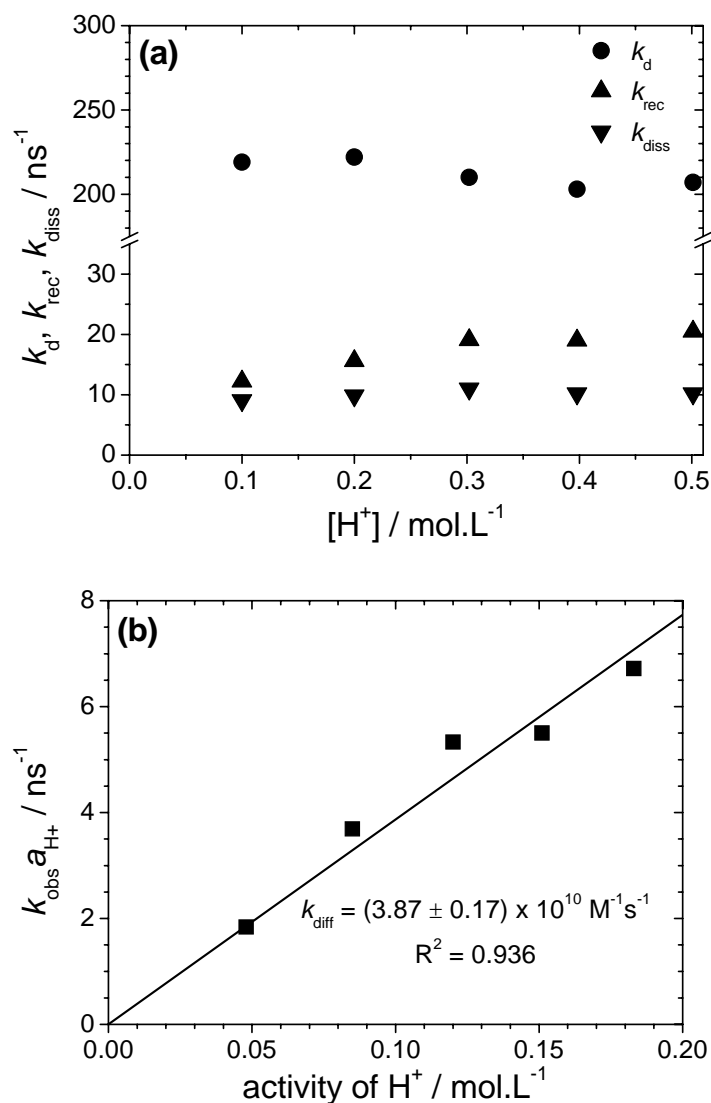

**Figure 1S.** (a) Deprotonation, recombination and dissociation rate constants ( $k_d$ ,  $k_{rec}$ ,  $k_{diss}$ ) as a function of  $[\text{H}^+]$ ; (b) rate constants for diffusion-controlled formation of the geminate pair ( $k_{diff}a_{\text{H}^+}$ ) in water-1,4-dioxane ( $x_{\text{Dx}} = 0.18$ ), as a function of the activity of  $\text{H}^+$ .

The deprotonation constant  $k_d$  (average value of  $2.1 \pm 0.1 \times 10^{11} \text{ s}^{-1}$ ) is smaller than that observed for HMF in water<sup>9</sup> ( $2.5 \pm 0.4 \times 10^{11} \text{ s}^{-1}$ ) and reflects the decrease in dielectric constant of the solution rather than a disruption of the hydrogen-bonding network, because water clusters are still present in the mixtures at  $x_{\text{Dx}} = 0.18$ .<sup>S2,S3</sup> The behavior of the recombination rate constant  $k_{rec}$  explains why the geminate pair is detected in  $\text{H}_2\text{O}:\text{Dx}$  mixtures and not in water. In water,  $k_{rec}$  is negligible (expected<sup>9</sup> to be smaller than  $2 \times 10^9 \text{ s}^{-1}$ ) and the geminate pair is not detected because the efficiency of pair

recombination [ $k_{\text{rec}}/(k_{\text{rec}} + k_{\text{diss}})$ ] is much too small. On the other hand, the addition of cosolvent increases  $k_{\text{rec}}$  to *ca.*  $1.7 \pm 0.3 \times 10^{10} \text{ s}^{-1}$  at  $x_{\text{Dx}} = 0.18$ , making it of the same order of magnitude as  $k_{\text{diss}}$  ( $1.0 \pm 0.1 \times 10^{10} \text{ s}^{-1}$ ), resulting in a pair recombination efficiency of 0.6.

The dissociation constant of the geminate pair,  $k_{\text{diss}}$ , depends on the viscosity  $\eta$  of the solution and can be estimated<sup>S4</sup> from the diffusion coefficient of the species  $D_i$ , given by  $D_i = k_{\text{B}}T/(6\pi\eta R_i f_i)$ , where

$$f_i = \left[ 1.5 \frac{R_{\text{H}_2\text{O}}}{R_i} + \left( 1 + \frac{R_{\text{H}_2\text{O}}}{R_i} \right)^{-1} \right]^{-1}.$$

In this equation,  $k_{\text{B}}$  is the Boltzmann constant and  $R_i$  is the van der Waals radius of the species, calculated with the program GEPOL.<sup>S5</sup> Assuming that the binding energy of the encounter complex is zero and taking  $R_{\text{H}_2\text{O}} = 1.4 \text{ \AA}$ ,  $R_{\text{H}_3\text{O}_2^+} + R_{\text{HMF}} = 5.9 \text{ \AA}$  and  $\eta = 2.19 \text{ cP}$  (interpolated from data at  $T = 25 \text{ }^\circ\text{C}$  in reference S6), one obtains  $k_{\text{diss}} = 3(D_{\text{H}_3\text{O}_2^+} + D_{\text{HMF}})/(R_{\text{H}_3\text{O}_2^+} + R_{\text{HMF}})^2 = 1.1 \times 10^{10} \text{ s}^{-1}$ , which is in good agreement with the experimental value.

**Table 1S.** Decay times ( $\tau_j \pm 10\%$ ) and pre-exponential coefficients ( $A_{i,j}$ ) of HMF in water:1,4-dioxane solutions ( $x_{\text{Dx}} = 0.18$ ) at  $T = 25 \text{ }^\circ\text{C}$  obtained from global analysis of the decays collected at 480 nm (emission of  $\text{AH}^{+*}$ ,  $i = 1$ ) and at 620 nm (emission of  $\text{A}^*$ ,  $i = 2$ ), with excitation at 434 nm. The reduced chi-squared ( $\chi_i^2$ ) of the global analyses is also presented.

| $[\text{H}^+]/$<br>$\text{mol}\cdot\text{L}^{-1}$ | $\tau_1 /$<br>ps | $\tau_2 /$<br>ps | $\tau_3 /$<br>ps | $A_{1,1}$ | $A_{1,2}$ | $A_{1,3}$ | $A_{2,1}$ | $A_{2,2}$ | $A_{2,3}$ | $\chi_1^2$ | $\chi_2^2$ |
|---------------------------------------------------|------------------|------------------|------------------|-----------|-----------|-----------|-----------|-----------|-----------|------------|------------|
| 0.50                                              | 168              | 48.8             | 4.40             | 0.03      | 0.07      | 0.90      | 1.00      | -0.08     | -0.92     | 1.03       | 1.00       |
| 0.40                                              | 170              | 49.0             | 4.50             | 0.03      | 0.06      | 0.91      | 1.00      | -0.07     | -0.93     | 1.06       | 1.10       |
| 0.30                                              | 169              | 47.5             | 4.35             | 0.03      | 0.06      | 0.91      | 1.00      | -0.08     | -0.92     | 0.93       | 1.01       |
| 0.20                                              | 158              | 53.3             | 4.35             | 0.02      | 0.06      | 0.92      | 1.00      | -0.09     | -0.91     | 1.02       | 1.03       |
| 0.10                                              | 157              | 57.8             | 4.35             | 0.01      | 0.05      | 0.94      | 1.00      | -0.07     | -0.93     | 0.95       | 1.08       |
| $1.0 \times 10^{-9}$                              | 146              | -                | -                | -         | -         | -         | 1.00      | -         | -         | -          | 1.06       |

## References

- S1 J. S. Melo and A. L. Maçanita, Three interconverting excited species: experimental study and solution of the general photokinetic triangle by time-resolved fluorescence, *Chem. Phys. Lett.* 1993, **204**, 556–562.
- S2 T. Takamuku, A. Yamaguchi, M. Tabata, N. Nishi, K. Yoshida, H. Wakita and T. Yamaguchi, Structure and dynamics of 1,4-dioxane–water binary solutions studied by X-ray diffraction, mass spectrometry, and NMR relaxation, *J. Mol. Liq.* 1999, **83**, 163–177.
- S3 T. Takamuku, A. Yamaguchi, D. Matsuo, T. Yamaguchi, T. Otomo and T. Adachi, NaCl-induced phase separation of 1,4-dioxane–water mixtures studied by large-angle X-ray scattering and small-angle neutron scattering techniques, *J. Phys. Chem. B* 2001, **105**, 10101–10110.
- S4 S. M. B. Costa, A. L. Maçanita and S. J. Formosinho, Effective distances of exothermic charge-transfer reactions in the excited state, *J. Phys. Chem.* 1984, **88**, 4089–4095.
- S5 J. L. Pascual-Ahuir and E. Silla, GEPOL: An improved description of molecular surfaces. I. Building the spherical surface set, *J. Comp. Chem.* 1990, **11**, 1047–1060.
- S6 J. Geddes, The fluidity of dioxane–water mixtures, *J. Am. Chem. Soc.* 1933, **55**, 4832–4837.
